# Supplementary material for: Elucidating challenges that electronic cigarettes pose to tobacco control in Asia: a population-based national survey in Taiwan
Source: PubMed Central journal article supplement — BMJ Open. 2017 Mar 27;7(3):e014263. doi: 10.1136/bmjopen-2016-014263 (PMC5372145; doi:10.1136/bmjopen-2016-014263), 2017-03-27
Supplement: bmjopen-2016-014263supp_table.pdf [file bmjopen-2016-014263supp_table.pdf]

**Supplementary Table 1.** Prevalence of e-cigarette use among age groups with different smoking status

| Age group (years)               | 15–17        |                     |      | 18–24               |      |                     | 25–44        |                     |   | ≥45                 |  |  |
|---------------------------------|--------------|---------------------|------|---------------------|------|---------------------|--------------|---------------------|---|---------------------|--|--|
|                                 | Never smoker |                     |      | Never smoker        |      |                     | Never smoker |                     |   | Never smoker        |  |  |
|                                 | (n =942)     |                     |      | (n =1763)           |      |                     | (n =5239)    |                     |   | (n =12677)          |  |  |
| Smoking status                  | n            | Prevalence (95% CI) | n    | Prevalence (95% CI) | n    | Prevalence (95% CI) | n            | Prevalence (95% CI) | n | Prevalence (95% CI) |  |  |
| <b>Gender</b>                   |              |                     |      |                     |      |                     |              |                     |   |                     |  |  |
| Male                            | 520          | 2.5 (1.07- 3.93)    | 832  | 3.9 (2.36- 5.53)    | 1701 | 1.1 (0.51- 1.64)    | 3661         | 0.2 (0.04- 0.40)    |   |                     |  |  |
| Female                          | 422          | 0.3 (0.00- 0.84)    | 931  | 1.9 (0.86- 3.02)    | 3538 | 0.4 (0.17- 0.54)    | 9016         | 0.1 (0.02- 0.12)    |   |                     |  |  |
| <b>Living in municipal area</b> |              |                     |      |                     |      |                     |              |                     |   |                     |  |  |
| No                              | 615          | 1.4 (0.31- 2.57)    | 1078 | 2.0 (0.94- 2.99)    | 3103 | 0.7 (0.32- 1.00)    | 8038         | 0.1 (0.04- 0.22)    |   |                     |  |  |
| Yes                             | 327          | 1.6 (0.37- 2.78)    | 685  | 4.1 (2.42- 5.86)    | 2136 | 0.6 (0.24- 0.98)    | 4639         | 0.1 (0.01- 0.18)    |   |                     |  |  |
| <b>Marital status</b>           |              |                     |      |                     |      |                     |              |                     |   |                     |  |  |
| No                              | 941          | 1.5 (0.67- 2.33)    | 1725 | 3.0 (2.04- 4.01)    | 1940 | 0.9 (0.43- 1.43)    | 3079         | 0.0 (0.00- 0.12)    |   |                     |  |  |
| Yes                             | 1            | 0.0 (0.00- 0.00)    | 36   | 0.0 (0.00- 0.00)    | 3282 | 0.4 (0.20- 0.66)    | 9486         | 0.1 (0.06- 0.22)    |   |                     |  |  |
| <b>Education level</b>          |              |                     |      |                     |      |                     |              |                     |   |                     |  |  |
| Middle School or below          | 243          | 1.4 (0.04- 2.79)    | 16   | 11.0 (0.00- 31.36)  | 191  | 0.1 (0.00- 0.30)    | 5224         | 0.1 (0.00- 0.12)    |   |                     |  |  |
| High School                     | 662          | 1.6 (0.60- 2.66)    | 504  | 1.3 (0.18- 2.36)    | 1182 | 0.4 (0.02- 0.77)    | 3569         | 0.2 (0.00- 0.35)    |   |                     |  |  |
| College or above                | 37           | 0.0 (0.00- 0.00)    | 1240 | 3.4 (2.20- 4.61)    | 3860 | 0.8 (0.43- 1.09)    | 3807         | 0.2 (0.03- 0.28)    |   |                     |  |  |
| <b>Employed</b>                 |              |                     |      |                     |      |                     |              |                     |   |                     |  |  |
| No                              | 836          | 1.2 (0.41- 2.07)    | 1069 | 2.4 (1.20- 3.60)    | 1180 | 0.5 (0.00- 1.06)    | 7615         | 0.1 (0.02- 0.21)    |   |                     |  |  |
| Yes                             | 106          | 3.5 (0.16- 6.80)    | 694  | 3.7 (2.12- 5.27)    | 4059 | 0.7 (0.39- 0.95)    | 5062         | 0.1 (0.03- 0.20)    |   |                     |  |  |
| <b>Household income</b>         |              |                     |      |                     |      |                     |              |                     |   |                     |  |  |
| ≤20,000                         | 33           | 0.0 (0.00- 0.00)    | 43   | 0.0 (0.00- 0.00)    | 175  | 0.6 (0.00- 1.85)    | 2703         | 0.0 (-0.01- 0.02)   |   |                     |  |  |
| 20,001-60,000                   | 319          | 1.6 (0.00- 3.35)    | 559  | 1.9 (0.39- 3.50)    | 1895 | 0.5 (0.19- 0.85)    | 4153         | 0.1 (0.00- 0.28)    |   |                     |  |  |
| 60,001-100,000                  | 164          | 2.1 (0.00- 4.22)    | 410  | 4.8 (2.24- 7.29)    | 1448 | 0.7 (0.14- 1.34)    | 1887         | 0.0 (-0.05- 0.14)   |   |                     |  |  |
| >100,001                        | 75           | 1.7 (0.00- 4.73)    | 230  | 4.4 (1.41- 7.34)    | 957  | 1.2 (0.45- 2.01)    | 1509         | 0.2 (-0.01- 0.49)   |   |                     |  |  |
| Unknown                         | 351          | 1.2 (0.16- 2.32)    | 521  | 2.1 (0.71- 3.54)    | 754  | 0.1 (0.00- 0.25)    | 2425         | 0.2 (0.00- 0.33)    |   |                     |  |  |

PR, prevalence ratio; CI, confidence interval
